# Supplementary material for: Optical observations and spatio-temporal projections of gelatinous zooplankton in the Fram Strait, a gateway to a changing Arctic Ocean
Source: Frontiers journal article supplement (doi:10.3389/fmars.2023.987700), 2023-05-05
Supplement: Table_1.XLSX [file Table_1.XLSX]

## Sheet: Table S1. 
Table S1. Metadata of PELAGIOS stations during the PS121 and PS126 expeditions.
Station		PS121 (HG4/2)	PS121 (EG4)	PS121 (N4/1)	PS121 (N4/2)	PS126 (S3)	PS126 (HG4)	PS126 (EG4)	Total
Latitude		79.0628	78.8838	79.7332	79.7331	78.6028	79.0614	78.7169
Longitude		4.24258	-2.4308	4.47867	4.48432	5.0825	4.225	-2.5328
Date		24.08.19	30.08.19	04.09.19	06.09.19	31.05.21	02.06.21	13.06.21
Sum transects duration time [hh:mm:ss]		2:46:04	2:36:00	2:39:14	1:24:41	1:10:00	1:10:00	1:41:00	13:26:59
Transect depth [m.] and ransect duration [mm]	20	x	x	x	x	00:10:00	00:10:00	x	0:20:00
	35	x	00:10:00	00:10:00	x	x	x	x	0:20:00
	50	00:15:14	00:15:00	00:15:00	x	00:10:00	00:10:00	x	1:05:14
	200	00:15:00	00:16:00	00:15:02	00:02:00	00:10:00	00:10:00	00:10:00	1:18:02
	400	00:15:50	00:15:00	00:14:45	00:16:17	00:10:00	00:10:00	00:10:00	1:31:52
	600	00:20:00	00:20:00	00:15:32	00:17:00	00:10:00	00:10:00	00:10:00	1:42:32
	800	00:20:15	00:20:00	00:20:54	00:16:27	00:10:00	00:10:00	00:10:00	1:47:36
	1000	00:19:45	00:20:00	00:19:10	x	00:10:00	00:10:00	00:10:00	1:28:55
	1300	00:20:00	00:20:00	00:20:03	x	x	x	00:10:00	1:10:03
	1600	00:20:00	00:10:00	00:15:00	x	x	x	00:10:00	0:55:00
	1800	x	x	x	x	x	x	00:10:00	0:10:00
	1900	00:20:00	00:10:00	00:13:48	x	x	x	x	0:43:48
	2000	x	x	x	x	x	x	00:21:00	0:21:00
	2200	x	x	x	00:16:30	x	x	x	0:16:30
	2500	x	x	x	00:16:27	x	x	x	0:16:27
