# Supplementary material for: Optical observations and spatio-temporal projections of gelatinous zooplankton in the Fram Strait, a gateway to a changing Arctic Ocean
Source: Frontiers journal article supplement (doi:10.3389/fmars.2023.987700), 2023-05-05
Supplement: Table_2.XLSX [file Table_2.XLSX]

## Sheet: data_PS121_PS126
Table S2. Biological and environmental data used for modeling.
Expedition	Station	Longitude	Latitude	Aglantha digitale	Atolla spp.	Aulacoctena spp.	Bathyctena spp.	Bathykorus bouilloni	Beroe spp.	Botrynema spp.	Botrynema brucei	Botrynema ellinorae	Calycophorae spp.	Crossota spp.	Ctenophore spp.	Dryodora glandiformis	Euplokamis spp.	Lobata spp.	Physonectae spp.	Ptychogena hyperborea	Sminthea arctica	Solmundella bitentaculata	Trachymedusae	Depth (meters)	Temperature (°C)	Salinity (PSU)	Oxygen (%)	Sea Ice (%)
PS121	EG4	-2.74125	78.8838	12.5	0	0	0	0	0	0	0	0	0	0	0	0	0	0	0	0	0	0	0	200	3.09763	34.9679	92.2196	62.7265
PS121	EG4	-2.74125	78.8838	780	0	0	0	0	6.66667	0	0	0	73.3333	0	0	0	0	0	0	0	0	0	0	400	1.97245	34.9246	89.7066	62.7265
PS121	EG4	-2.74125	78.8838	115	0	0	0	0	15	0	0	0	140	0	0	0	0	0	35	0	0	0	0	600	1.32078	34.9373	88.9399	62.7265
PS121	EG4	-2.74125	78.8838	180	0	0	0	0	0	5	0	25	125	0	0	0	0	5	60	0	0	0	10	800	0.410712	34.9064	86.7232	62.7265
PS121	EG4	-2.74125	78.8838	5	0	5	0	0	5	20	5	40	5	0	0	0	0	5	50	0	125	0	20	1000	-0.0426438	34.8952	84.663	62.7265
PS121	EG4	-2.74125	78.8838	0	15	0	0	5	0	15	5	55	5	0	0	0	0	5	20	5	515	5	0	1300	-0.294658	34.9065	84.6627	62.7265
PS121	EG4	-2.74125	78.8838	0	70	0	0	10	0	0	20	0	10	10	0	0	0	0	10	0	270	40	10	1600	-0.448549	34.9116	82.2167	62.7265
PS121	EG4	-2.74125	78.8838	0	100	0	0	10	0	0	50	0	0	10	0	0	0	10	20	10	100	60	20	1900	-0.578751	34.9114	81.5788	62.7265
PS121	HG4	4.24258	79.0628	138.977	0	0	0	0	0	0	0	0	56.8421	0	6.31712	0	0	0	18.9514	0	0	0	0	400	1.98458	34.9468	91.1356	9.42123
PS121	HG4	4.24258	79.0628	10	0	0	0	0	20	5	0	15	10	0	0	0	5	0	50	0	5	0	0	600	0.537097	34.9179	88.0615	9.42123
PS121	HG4	4.24258	79.0628	4.93827	0	0	0	0	9.87654	4.93827	0	24.6914	4.93827	0	9.87654	0	0	0	83.9506	0	19.7531	0	0	800	-0.0702709	34.9043	86.1023	9.42123
PS121	HG4	4.24258	79.0628	0	0	0	0	0	0	5.06329	0	0	5.06329	0	0	0	0	0	81.0127	0	25.3165	0	0	1000	-0.273969	34.9053	85.2899	9.42123
PS121	HG4	4.24258	79.0628	0	0	0	0	0	0	5	0	15	0	0	0	0	0	10	85	0	85	0	15	1300	-0.512328	34.907	84.4911	9.42123
PS121	HG4	4.24258	79.0628	0	0	0	0	0	0	5	0	0	5	0	0	0	0	0	15	0	250	5	0	1600	-0.65515	34.9077	81.9091	9.42123
PS121	HG4	4.24258	79.0628	0	15	0	0	30	0	85	50	0	0	30	0	0	0	0	5	0	15	10	20	1900	-0.718534	34.9088	80.7503	9.42123
PS121	N4_1	4.47867	79.7332	119.721	0	0	0	0	0	0	0	0	0	0	0	0	6.65336	0	0	0	0	0	0	200	3.09753	34.982	93.4575	37.7684
PS121	N4_1	4.47867	79.7332	474.576	0	0	0	0	0	0	0	0	183.051	0	6.77966	0	13.5593	0	0	0	0	0	0	400	1.99706	34.948	91.1852	37.7684
PS121	N4_1	4.47867	79.7332	180.296	0	0	0	0	0	0	0	0	379.828	0	12.8783	0	12.8783	6.43915	57.9524	0	0	0	0	600	0.747396	34.9223	88.3555	37.7684
PS121	N4_1	4.47867	79.7332	0	0	0	0	0	9.56938	0	0	0	162.679	0	4.78469	0	0	0	43.0622	0	0	0	0	800	-0.0517765	34.9074	85.8715	37.7684
PS121	N4_1	4.47867	79.7332	73.0689	0	5.10204	0	0	5.21921	15.6576	0	0	41.7391	0	0	0	0	0	10.4384	0	0	0	0	1000	-0.380493	34.9065	85.4363	37.7684
PS121	N4_1	4.47867	79.7332	4.98753	0	0	0	0	0	9.97506	0	0	0	0	0	0	0	0	44.8878	0	24.9377	0	0	1300	-0.512328	34.907	84.4911	37.7684
PS121	N4_1	4.47867	79.7332	0	0	0	0	0	0	6.66667	6.66667	20	0	0	0	0	0	13.3333	40	0	126.667	0	0	1600	-0.65515	34.9077	81.9091	37.7684
PS121	N4_1	4.47867	79.7332	0	72.4638	0	0	0	0	14.4928	7.24638	0	0	0	0	0	0	0	0	0	376.812	0	0	1900	-0.718534	34.9088	80.7503	37.7684
PS121	N4_2	4.48432	79.7331	300.921	0	0	0	6.14251	61.4251	0	0	0	135.107	0	0	0	6.14251	12.285	12.285	0	0	0	0	400	1.99706	34.948	91.1852	37.7684
PS121	N4_2	4.48432	79.7331	29.4118	0	0	0	0	11.7647	0	0	5.88235	270.588	0	0	0	0	5.88235	52.9412	0	0	0	0	600	0.747396	34.9223	88.3555	37.7684
PS121	N4_2	4.48432	79.7331	42.5532	0	0	0	0	12.1581	0	0	6.07903	18.2371	0	6.07903	0	0	0	30.3951	0	0	0	0	800	-0.0517765	34.9074	85.8715	37.7684
PS121	N4_2	4.48432	79.7331	0	6.06061	0	12.1212	60.6061	0	24.2424	60.6061	0	6.06061	0	0	0	0	6.06061	0	0	36.3636	12.1212	0	2200	-0.727576	34.911	80.3641	37.7684
PS121	N4_2	4.48432	79.7331	0	18.2371	0	0	54.7112	0	42.5532	48.6322	0	6.07903	0	0	0	0	0	0	0	0	0	0	2500	-0.733118	34.9191	80.5745	37.7684
PS126	EG4	-2.31968	78.4302	1230	0	10	0	0	40	0	0	0	80	0	50	0	0	0	20	0	0	0	0	400	1.32097	34.9137	87.997	46.0547
PS126	EG4	-2.31968	78.4302	30	0	0	0	0	10	10	0	10	180	0	30	0	10	0	120	0	0	0	10	600	0.571535	34.8971	84.8314	46.0547
PS126	EG4	-2.31968	78.4302	0	10	0	0	0	0	20	0	0	20	0	0	0	0	0	20	0	190	30	50	800	-0.0445277	34.8894	83.2614	46.0547
PS126	EG4	-2.31968	78.4302	0	30	0	0	0	0	30	10	50	0	0	0	0	0	20	0	0	180	30	30	1000	-0.205304	34.9019	82.8308	46.0547
PS126	EG4	-2.31968	78.4302	0	70	0	0	0	0	80	0	10	0	0	0	0	0	10	20	0	110	10	30	1300	-0.405572	34.9103	82.4599	46.0547
PS126	EG4	-2.31968	78.4302	0	50	0	0	10	0	50	20	0	0	10	0	0	0	10	30	0	30	20	10	1600	-0.579676	34.9108	81.0863	46.0547
PS126	EG4	-2.31968	78.4302	0	10	0	0	60	0	20	20	0	0	0	0	0	0	0	0	20	70	10	30	1800	-0.654786	34.92	79.8803	46.0547
PS126	EG4	-2.31968	78.4302	0	14.2857	0	0	133.333	0	19.0476	23.8095	0	0	52.381	0	0	0	0	19.0476	0	14.2857	4.7619	61.9048	2000	-0.439067	34.9081	79.154	46.0547
PS126	HG4	4.13505	78.0368	0	0	0	0	0	0	0	0	0	0	0	30	0	0	0	0	0	0	0	0	20	-0.0970349	34.4173	96.2847	0
PS126	HG4	4.13505	78.0368	70	0	0	0	0	0	0	0	0	0	0	10	0	0	0	0	0	0	0	0	50	3.04176	34.886	95.8053	0
PS126	HG4	4.13505	78.0368	570	0	0	0	0	0	0	0	0	70	0	40	0	0	0	0	0	0	0	0	200	2.55408	34.9683	94.0833	0
PS126	HG4	4.13505	78.0368	1000	0	0	0	0	20	0	0	0	320	0	70	0	10	0	50	0	0	0	0	400	1.96036	34.9355	89.701	0
PS126	HG4	4.13505	78.0368	40	0	0	0	0	20	0	0	0	20	0	30	20	0	10	110	0	10	0	0	600	1.2703	34.9155	84.9369	0
PS126	HG4	4.13505	78.0368	0	30	0	0	0	0	40	20	10	40	0	0	20	0	20	50	0	450	30	50	800	0.389993	34.8979	84.411	0
PS126	HG4	4.13505	78.0368	0	40	0	0	0	0	60	10	10	0	0	0	0	0	10	60	0	300	50	50	1000	-0.00554681	34.902	83.1172	0
PS126	S3	5.04955	78.3617	0	0	0	0	0	10	0	0	0	0	0	20	0	0	0	0	0	0	0	0	20	2.75812	34.8749	96.2847	0
PS126	S3	5.04955	78.3617	0	0	0	0	0	0	0	0	0	0	0	30	0	0	0	0	0	0	0	0	50	2.59585	34.9714	95.8053	0
PS126	S3	5.04955	78.3617	110	0	0	0	0	0	0	0	0	0	0	0	0	0	0	0	0	0	0	0	200	1.66761	34.9688	94.0833	0
PS126	S3	5.04955	78.3617	10	0	0	0	0	30	10	0	0	40	0	10	0	0	10	10	0	110	0	10	400	0.21145	34.9002	89.701	0
PS126	S3	5.04955	78.3617	0	0	0	0	0	0	30	0	0	20	0	0	0	0	0	60	0	240	30	60	600	-0.0762308	34.9057	84.9369	0
PS126	S3	5.04955	78.3617	0	10	0	0	0	0	0	0	0	40	0	0	0	0	10	0	0	120	0	50	800	-0.275083	34.9087	84.411	0
PS126	S3	5.04955	78.3617	0	10	0	0	0	0	20	0	0	10	0	0	0	0	0	20	0	110	0	20	1000	-0.439067	34.9081	83.1172	0
																							0
